# Supplementary material
Source: PubMed Central journal article supplement (PMC5901076)
Supplement: nlx049_suppfigure1.pdf [file nlx049_suppfigure1.pdf]

Supplementary Figure 1 Spheroids of Perry Syndrome

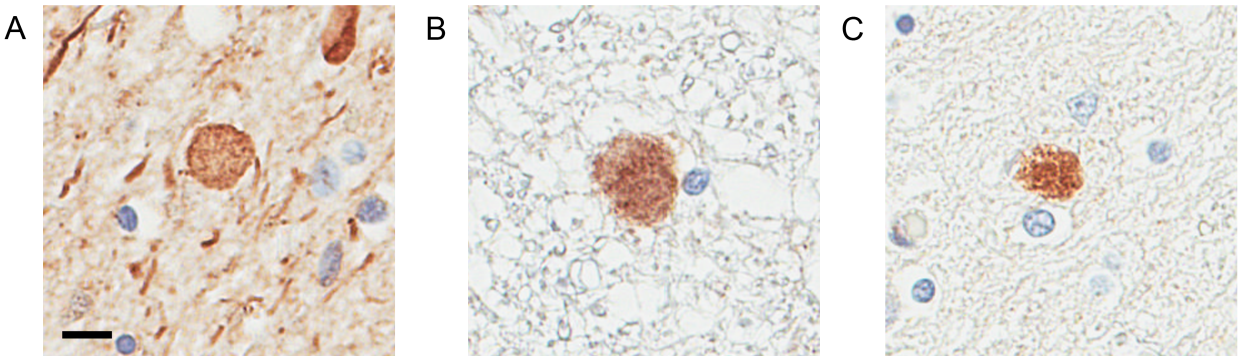

Spheroids in the substantia nigra from the same case are labeled with phosphorylated neurofilament protein (A), amyloid precursor protein (B), and p50 (C). Scale bar = 10  $\mu$ m.
